# Supplementary material for: Wie häufig ist die persistierende Tubenventilationsstörung nach erfolgter Gaumenspaltenoperation wirklich?
Source: Springer Nature journal article supplement (doi:10.1007/s00106-022-01147-z), 2022-03-22
Supplement: MOESM1 [file 20243232]

Patient:

Geschlecht:

Alter:

Datum der Untersuchung:

| Seite                                                                                |              | ETS-7 |    |
|--------------------------------------------------------------------------------------|--------------|-------|----|
|                                                                                      |              | re    | li |
| <b>Tuben-<br/>öffnung beim Schlucken</b>                                             | Ja (2 P.)    |       |    |
|                                                                                      | ab&zu (1 P.) |       |    |
|                                                                                      | Nein (0 P.)  |       |    |
| <b>Valsalva positiv</b>                                                              | Ja (2 P.)    |       |    |
|                                                                                      | ab&zu (1 P.) |       |    |
|                                                                                      | Nein (0 P.)  |       |    |
| <b>TMM 30 mbar</b><br>R-Wert<br>(R ≤ 1: 2 P.; R > 1: 1 P.; kein R: 0 P.)             |              |       |    |
| <b>TMM 40 mbar</b><br>R-Wert<br>(R ≤ 1: 2 P.; R > 1: 1 P.; kein R: 0 P.)             |              |       |    |
| <b>TMM 50 mbar</b><br>R-Wert<br>(R ≤ 1: 2 P.; R > 1: 1 P.; kein R: 0 P.)             |              |       |    |
| <b>Objektiver Valsalva</b><br>(Punkte für Positiv=2, schwach/verzögert=1, negativ=0) |              |       |    |
| <b>Tympanogramm nach Jerger</b><br>(Punkte für Typ A=2, Typ C=1, Typ B=0)            |              |       |    |
| <b>Score gesamt</b>                                                                  |              |       |    |
