# Supplementary material for: Wie häufig ist die persistierende Tubenventilationsstörung nach erfolgter Gaumenspaltenoperation wirklich?
Source: Springer Nature journal article supplement (doi:10.1007/s00106-022-01147-z), 2022-03-22
Supplement: MOESM2 [file 20243232]

Patient:

Geschlecht:

Alter:

**Datum:**
**Liegen folgende Beschwerden/Befunde bei Ihnen vor?**

- Druckgefühl oder Schmerzen im Ohr z.B. bei Berg- und Talfahrt:  rechts  links
- Verschwinden des Druckgefühls durch Schlucken:  rechts  links
- Knacken im Ohr beim Schlucken:  rechts  links
- Druckausgleich durch Valsalva:  rechts  links
- Häufige oder chronische Mittelohrentzündungen:  rechts  links
- Ohrenlaufen:  rechts  links
- zurückliegende Ohroperationen: (bitte hier notieren)

**Wie sehr haben Sie folgende Probleme im letzten Monat beeinträchtigt?**

| Beschwerden                                                                              | kein Problem |          | mäßiges Problem |          |          | schweres Problem |          |
|------------------------------------------------------------------------------------------|--------------|----------|-----------------|----------|----------|------------------|----------|
| <b>1. Druckgefühl im Ohr</b>                                                             | <b>1</b>     | <b>2</b> | <b>3</b>        | <b>4</b> | <b>5</b> | <b>6</b>         | <b>7</b> |
| <b>2. Schmerzen in den Ohren</b>                                                         | <b>1</b>     | <b>2</b> | <b>3</b>        | <b>4</b> | <b>5</b> | <b>6</b>         | <b>7</b> |
| <b>3. Das Gefühl die Ohren seien verstopft oder „unter Wasser“</b>                       | <b>1</b>     | <b>2</b> | <b>3</b>        | <b>4</b> | <b>5</b> | <b>6</b>         | <b>7</b> |
| <b>4. Ohrbeschwerden im Rahmen von einfachen Erkältungen und Nebenhöhlenentzündungen</b> | <b>1</b>     | <b>2</b> | <b>3</b>        | <b>4</b> | <b>5</b> | <b>6</b>         | <b>7</b> |
| <b>5. Knisternde oder Knallende Geräusche in den Ohren</b>                               | <b>1</b>     | <b>2</b> | <b>3</b>        | <b>4</b> | <b>5</b> | <b>6</b>         | <b>7</b> |
| <b>6. Klingeln in den Ohren</b>                                                          | <b>1</b>     | <b>2</b> | <b>3</b>        | <b>4</b> | <b>5</b> | <b>6</b>         | <b>7</b> |
| <b>7. Das Gefühl das Hören sei dumpf</b>                                                 | <b>1</b>     | <b>2</b> | <b>3</b>        | <b>4</b> | <b>5</b> | <b>6</b>         | <b>7</b> |

**Gesamtpunktzahl:** \_\_\_\_\_
